# Supplementary material for: The role of three heat shock protein genes in the immune response to Aeromonas hydrophila challenge in marbled eel, Anguilla marmorata
Source: R Soc Open Sci. 2016 Oct 19;3(10):160375. doi: 10.1098/rsos.160375 (PMC5098978; doi:10.1098/rsos.160375)
Supplement: 1. Tissue distribution of original data [file rsos160375supp1.xlsx]

## Sheet: liver
Sample Name	Target Name	ct1/ct2/ct3	△ct	MEAN△ct	△△ct	2^-△△ct	mean	SD	Sample Name	Target Name	ct1/ct2/ct3	△ct	MEAN△ct	△△ct	2^-△△ct	mean	SD
L 0h	actin	24.0187							1h	actin	24.5544
L	actin	24.1798							1h	actin	24.267
L	actin	24.2619							1h	actin	24.1374
L	hsp90	27.9995	3.98088	3.85552	0	1	1	0.124745	1h	HSP90	26.304	1.74957	1.6117	-2.2313	4.69559	4.74162	0.271476
L	hsp90	27.9112	3.7314		0	1			1h	HSP90	25.8298	1.56272		-2.16868	4.49611
L	hsp90	28.1162	3.85428		0	1			1h	HSP90	25.6602	1.52281		-2.33147	5.03318
L	hsp70	23.9726	-0.0460846	-0.234074	0	1	1	0.216125	1h	HSP70	22.9079	-1.6465	-1.66037	-1.60042	3.03231	2.69939	0.311533
L	hsp70	23.9938	-0.185925		0	1			1h	HSP70	22.6746	-1.59243		-1.40651	2.65095
L	hsp70	23.7917	-0.470214		0	1			1h	HSP70	22.3953	-1.74219		-1.27197	2.41492
L	hsc70	22.9469	-1.07179	-1.10521	0	1	1	0.167645	1h	HSC70	21.9619	-2.59257	-2.52244	-1.52078	2.86947	2.67428	0.170755
L	hsc70	22.8927	-1.28704		0	1			1h	HSC70	21.6281	-2.63897		-1.35192	2.55252
L	hsc70	23.3051	-0.956787		0	1			1h	HSC70	21.8017	-2.33577		-1.37898	2.60085
L 1h	actin	24.0397							3h	actin	24.2841
L	actin	24.0144							3h	actin	24.6357
L	actin	24.0267							3h	actin	24.4763
L	hsp90	27.7803	3.74064	3.64964	-0.240243	1.18119			3h	HSP90	27.9288	3.6447	3.32794	-0.336177	1.26241	1.46052	0.29828
L	hsp90	27.7058	3.69142		-0.0399788	1.0281	1.15759	0.119454	3h	HSP90	27.5162	2.88054		-0.850859	1.80357
L	hsp90	27.5435	3.51687		-0.337407	1.26348			3h	HSP90	27.9349	3.45858		-0.395701	1.31558
L	hsp70	23.9043	-0.135365	-0.236944	-0.0892799	1.06384	1.00451	0.0857732	3h	HSP70	22.0736	-2.21051	-2.28282	-2.16442	4.48287	4.15498	0.457659
L	hsp70	23.9706	-0.0437748		0.14215	0.906168			3h	HSP70	22.3288	-2.30692		-2.121	4.34994
L	hsp70	23.495	-0.531693		-0.0614788	1.04353			3h	HSP70	22.1453	-2.33102		-1.86081	3.63212
L	hsc70	22.6011	-1.4386	-1.32307	-0.366808	1.2895	1.16775	0.128041	3h	HSC70	21.4136	-2.87054	-2.93904	-1.79875	3.47918	3.57095	0.259003
L	hsc70	22.6788	-1.3356		-0.0485558	1.03423			3h	HSC70	21.5958	-3.03993		-1.75289	3.37033
L	hsc70	22.8317	-1.195		-0.238216	1.17953			3h	HSC70	21.5697	-2.90664		-1.94985	3.86335
L 3h	actin	24.2322							6h	actin	24.7576
L	actin	24.4069							6h	actin	24.5036
L	actin	24.3329							6h	actin	24.9259
L	hsp90	27.951	3.71877	3.87776	-0.262112	1.19923	0.994755	0.178252	6h	HSP90	25.7462	0.988659	0.968195	-2.99222	7.95698	7.42799	0.787444
L	hsp90	28.3357	3.92877		0.197369	0.872139			6h	HSP90	25.5294	1.02586		-2.70554	6.52303
L	hsp90	28.3187	3.98576		0.131482	0.912893			6h	HSP90	25.8159	0.89007		-2.96421	7.80396
L	hsp70	23.9679	-0.264349	-0.36537	-0.218265	1.16333	1.10003	0.122468	6h	hsp70	22.4112	-2.34633	-2.37701	-2.30025	4.92543	4.43343	0.474422
L	hsp70	23.9848	-0.422139		-0.236214	1.1779			6h	hsp70	22.3253	-2.17825		-1.99233	3.97879
L	hsp70	23.9233	-0.409622		0.0605915	0.958871			6h	hsp70	22.3194	-2.60643		-2.13622	4.39609
L	hsc70	22.7021	-1.53014	-1.63543	-0.458349	1.37397	1.45226	0.191725	6h	HSC70	21.2829	-3.47463	-3.45046	-2.40284	5.28843	5.11085	0.658391
L	hsc70	22.7281	-1.67888		-0.39184	1.31207			6h	HSC70	21.085	-3.41859		-2.13155	4.38188
L	hsc70	22.6357	-1.69727		-0.740486	1.67074			6h	HSC70	21.4677	-3.45816		-2.50137	5.66224
L 6h	actin	24.9495							12h	actin	24.6378
L	actin	25.0795							12h	actin	24.9304
L	actin	25.136							12h	actin	24.6997
L	hsp90	28.8956	3.94616	3.79729	-0.0347229	1.02436	1.04921	0.160167	12h	HSP90	26.5291	1.89135	1.67999	-2.08953	4.25609	4.52223	0.251695
L	hsp90	28.9582	3.87873		0.147334	0.902918			12h	HSP90	26.412	1.48152		-2.24988	4.75643
L	hsp90	28.703	3.56698		-0.287292	1.22035			12h	HSP90	26.3668	1.66709		-2.18719	4.55417
L	hsp70	24.6635	-0.285953	-0.647383	-0.239869	1.18089	1.33658	0.136824	12h	HSP70	22.98	-1.65775	-1.70738	-1.61167	3.05604	2.78592	0.278138
L	hsp70	24.3698	-0.709646		-0.523721	1.43766			12h	HSP70	23.2584	-1.67202		-1.48609	2.80129
L	hsp70	24.1895	-0.946549		-0.476335	1.3912			12h	HSP70	22.9073	-1.79238		-1.32216	2.50041
L	hsc70	23.6658	-1.28364	-1.47429	-0.211849	1.15817	1.30319	0.21954	12h	HSC70	21.6939	-2.94391	-3.15524	-1.87212	3.66069	4.1603	0.486108
L	hsc70	23.5347	-1.54481		-0.257765	1.19563			12h	HSC70	21.5769	-3.35349		-2.06645	4.18854
L	hsc70	23.5416	-1.59441		-0.637625	1.55577			12h	HSC70	21.5314	-3.16832		-2.21154	4.63168
L 12h	actin	24.3615							24h	actin	22.8038
L	actin	24.2309							24h	actin	22.5007
L	actin	24.3695							24h	actin	22.3584
L	hsp90	28.7695	4.40805	4.36698	0.427173	0.743718	0.711622	0.142835	24h	hsp90	24.5732	1.76933	1.80434	-2.21155	4.63172	4.1575	0.410696
L	hsp90	28.8106	4.57962		0.84822	0.555469			24h	hsp90	24.2605	1.75977		-1.97163	3.92211
L	hsp90	28.4828	4.11326		0.258982	0.835678			24h	hsp90	24.2423	1.88392		-1.97036	3.91866
L	hsp70	24.5625	0.201039	0.293034	0.247123	0.842575	0.701023	0.125014	24h	hsp70	20.1798	-2.62404	-2.73057	-2.57796	5.97094	5.64802	0.289343
L	hsp70	24.656	0.425039		0.610963	0.654759			24h	hsp70	19.8395	-2.66121		-2.47529	5.56078
L	hsp70	24.6225	0.253024		0.723238	0.605736			24h	hsp70	19.4519	-2.90646		-2.43625	5.41233
L	hsc70	23.3628	-0.998646	-1.00052	0.0731457	0.950563	0.931378	0.0613155	24h	hsc70	19.7871	-3.01669	-2.8779	-1.9449	3.85012	3.43204	0.396593
L	hsc70	23.1569	-1.07408		0.212962	0.862764			24h	hsc70	19.5996	-2.90112		-1.61408	3.06116
L	hsc70	23.4407	-0.928828		0.0279587	0.980807			24h	hsc70	19.6425	-2.71587		-1.75909	3.38484
L 24h	actin	23.6992							48h	actin	22.2279
L	actin	23.6524							48h	actin	22.7337
L	actin	23.8899							48h	actin	22.5071
L	hsp90	27.8518	4.15257	3.98705	0.171691	0.887801	0.915442	0.0852613	48h	hsp90	26.7182	4.49034	4.1644	0.509457	0.702487	0.811397	0.0985688
L	hsp90	27.3679	3.71548		-0.0159184	1.01109			48h	hsp90	26.7215	3.98772		0.256322	0.83722
L	hsp90	27.983	4.09311		0.238832	0.847431			48h	hsp90	26.5223	4.01515		0.160873	0.894484
L	hsp70	23.2214	-0.47784	-0.546391	-0.431756	1.34887	1.24503	0.11078	48h	hsp70	20.4006	-1.82725	-1.90467	-1.78116	3.43703	3.19819	0.367239
L	hsp70	23.2922	-0.360228		-0.174303	1.12842			48h	hsp70	20.7898	-1.9439		-1.75797	3.38222
L	hsp70	23.0888	-0.801104		-0.33089	1.25779			48h	hsp70	20.5643	-1.94287		-1.47266	2.77532
L	hsc70	22.8942	-0.805031	-0.81241	0.266761	0.831184	0.825122	0.14631	48h	hsc70	20.3525	-1.87537	-1.83046	-0.803576	1.74542	1.65444	0.0793151
L	hsc70	22.9306	-0.721874		0.565169	0.675876			48h	hsc70	20.7525	-1.98127		-0.694229	1.61802
L	hsc70	22.9796	-0.910324		0.046463	0.968307			48h	hsc70	20.8724	-1.63474		-0.677957	1.59987
L 48h	actin	24.2187							72h	actin	23.9302
L	actin	24.2798							72h	actin	23.5068
L	actin	24.2619							72h	actin	24.0691
L	hsp90	28.3995	4.18088	3.85552	0.2	0.870551	1.0047	0.116176	72h	hsp90	27.3811	3.45086	3.47593	-0.530018	1.44395	1.31001	0.18348
L	hsp90	27.9112	3.6314		-0.1	1.07177			72h	hsp90	27.0995	3.59274		-0.138656	1.10088
L	hsp90	28.0162	3.75428		-0.1	1.07177			72h	hsp90	27.4533	3.38417		-0.470102	1.38521
L	hsp70	24.3726	0.153915	0.232592	0.2	0.870551	0.731077	0.129168	72h	hsp70	23.5869	-0.343314	-0.250463	-0.297229	1.22878	1.02713	0.215686
L	hsp70	24.5938	0.314075		0.5	0.707107			72h	hsp70	23.6433	0.136501		0.322425	0.799724
L	hsp70	24.4917	0.229786		0.7	0.615572			72h	hsp70	23.5245	-0.544577		-0.0743633	1.0529
L	hsc70	22.9469	-1.27179	-1.20521	-0.2	1.1487	1.07349	0.074364	72h	hsc70	23.086	-0.844184	-0.830196	0.227608	0.85405	0.84027	0.183664
L	hsc70	22.8927	-1.38704		-0.1	1.07177			72h	hsc70	22.841	-0.665786		0.621257	0.650104
L	hsc70	23.3051	-0.956787		0	1			72h	hsc70	23.0885	-0.980618		-0.0238312	1.01666
L 72h	actin	24.9668
L	actin	25.1479
L	actin	25.1923
L	hsp90	28.6979	3.73113	3.57717	-0.249754	1.189	1.21383	0.0616939
L	hsp90	28.6547	3.50684		-0.224556	1.16842
L	hsp90	28.6858	3.49355		-0.360724	1.28407
L	hsp70	24.9858	0.0190235	-0.133868	0.0651081	0.955874	0.936329	0.0970027
L	hsp70	24.9305	-0.217421		-0.0314957	1.02207
L	hsp70	24.9891	-0.203207		0.267007	0.831042
L	hsc70	23.2583	-1.70843	-1.6583	-0.636636	1.5547	1.47625	0.195047
L	hsc70	23.165	-1.98292		-0.695873	1.61986
L	hsc70	23.9087	-1.28355		-0.326764	1.2542

## Sheet: muscle
Sample Name	Target Name	ct1/ct2/ct3	△ct	MEAN△ct	△△ct	2^-△△ct	mean	SD	Sample Name	Target Name	ct1/ct2/ct3	△ct	MEAN△ct	△△ct	2^-△△ct	mean	SD
M 0h	actin	25.8063							1h	actin	25.6397
M	actin	25.7944							1h	actin	25.4638
M	actin	25.7959							1h	actin	25.4032
M	hsp90	29.5089	3.70259	3.75918	0	1	1	0.0705479	1h	HSP90	28.4779	2.83816	2.82642	-0.864427	1.82062	1.92194	0.27948
M	hsp90	29.6327	3.83822		0	1			1h	HSP90	28.1398	2.67605		-1.16217	2.23795
M	hsp90	29.5327	3.73674		0	1			1h	HSP90	28.3682	2.96507		-0.771673	1.70725
M	hsp70	24.8247	-0.981628	-0.926974	0	1	1	0.0555164	1h	HSP70	22.8957	-2.74398	-2.68986	-1.76236	3.39252	3.39821	0.212845
M	hsp70	24.8658	-0.928659		0	1			1h	HSP70	22.8623	-2.60144		-1.67278	3.18827
M	hsp70	24.9253	-0.870634		0	1			1h	HSP70	22.679	-2.72417		-1.85354	3.61385
M	hsc70	24.8183	-0.98802	-1.08254	0	1	1	0.117813	1h	HSC70	23.3441	-2.29564	-2.22853	-1.30762	2.47533	2.22014	0.222273
M	hsc70	24.7494	-1.04508		0	1			1h	HSC70	23.3372	-2.12662		-1.08154	2.1163
M	hsc70	24.5814	-1.21453		0	1			1h	HSC70	23.1399	-2.26332		-1.04879	2.06879
M 1h	actin	25.6397							3h	actin	26.5629
M	actin	25.4638							3h	actin	26.7192
M	actin	25.4032							3h	actin	26.7449
M	hsp90	28.8779	3.23816	3.52642	-0.464427	1.37977	1.18654	0.199911	3h	HSP90	28.3231	1.76018	1.66982	-1.9424	3.84346	4.26648	0.366635
M	hsp90	29.0398	3.57605		-0.262175	1.19929			3h	HSP90	28.3899	1.67072		-2.1675	4.49244
M	hsp90	29.1682	3.76507		0.0283268	0.980557			3h	HSP90	28.3235	1.57855		-2.15819	4.46355
M	hsp70	24.1957	-1.44398	-1.25653	-0.462357	1.37779	1.25935	0.102885	3h	HSP70	23.1852	-3.37772	-3.42808	-2.39609	5.26374	5.6745	0.479888
M	hsp70	24.2623	-1.20144		-0.272776	1.20813			3h	HSP70	23.3161	-3.40317		-2.47451	5.55778
M	hsp70	24.279	-1.12417		-0.253536	1.19213			3h	HSP70	23.2416	-3.50336		-2.63273	6.20199
M	hsc70	23.9441	-1.69564	-1.66186	-0.707619	1.63311	1.49815	0.134116	3h	HSC70	23.7251	-2.8378	-2.84837	-1.84978	3.60446	3.41194	0.33267
M	hsc70	23.8372	-1.62662		-0.581542	1.49645			3h	HSC70	23.8247	-2.8945		-1.84942	3.60356
M	hsc70	23.7399	-1.66332		-0.448787	1.36489			3h	HSC70	23.9321	-2.81281		-1.59827	3.02781
M 3h	actin	25.5629							6h	actin	25.748
M	actin	25.6192							6h	actin	25.6182
M	actin	25.6449							6h	actin	25.6281
M	hsp90	29.3231	3.76018	3.63648	0.0575954	0.960864	1.09332	0.120355	6h	HSP90	27.6269	1.87892	2.08719	-1.82367	3.5398	3.19905	0.345261
M	hsp90	29.2899	3.67072		-0.1675	1.12311			6h	HSP90	27.7748	2.1566		-1.68163	3.20789
M	hsp90	29.1235	3.47855		-0.258191	1.19598			6h	HSP90	27.8541	2.22606		-1.51068	2.84945
M	hsp70	24.8852	-0.677718	-0.828084	0.30391	0.810054	0.938495	0.113058	6h	hsp70	23.3389	-2.40909	-2.36763	-1.42747	2.68974	2.72978	0.355992
M	hsp70	24.7161	-0.903168		0.0254913	0.982486			6h	hsp70	23.4292	-2.18898		-1.26032	2.3955
M	hsp70	24.7416	-0.903365		-0.0327305	1.02295			6h	hsp70	23.1233	-2.50481		-1.63417	3.10409
M	hsc70	24.7251	-0.837805	-0.881705	0.150215	0.901116	0.880743	0.165239	6h	HSC70	23.2256	-2.5224	-2.45572	-1.53438	2.89664	2.60017	0.277817
M	hsc70	24.5247	-1.0945		-0.0494217	1.03485			6h	HSC70	23.218	-2.40013		-1.35505	2.55806
M	hsc70	24.9321	-0.712809		0.501725	0.706262			6h	HSC70	23.1835	-2.44462		-1.23008	2.34581
M 6h	actin	24.748							12h	actin	25.9923
M	actin	24.8182							12h	actin	26.1368
M	actin	24.9281							12h	actin	26.0611
M	hsp90	28.1269	3.37892	3.62052	-0.323667	1.25151	1.10572	0.128786	12h	HSP90	27.9116	1.91932	1.87343	-1.78327	3.44206	3.71188	0.436715
M	hsp90	28.5748	3.7566		-0.0816257	1.05821			12h	HSP90	27.8993	1.76244		-2.07578	4.21573
M	hsp90	28.6541	3.72606		-0.0106815	1.00743			12h	HSP90	27.9997	1.93854		-1.7982	3.47785
M	hsp70	23.8389	-0.909095	-1.0343	0.0725338	0.950966	1.08158	0.116859	12h	HSP70	22.3989	-3.59335	-3.67873	-2.61172	6.11231	6.75241	0.581429
M	hsp70	23.7292	-1.08898		-0.160324	1.11754			12h	HSP70	22.4222	-3.71464		-2.78598	6.89707
M	hsp70	23.8233	-1.10481		-0.234172	1.17623			12h	HSP70	22.333	-3.72819		-2.85755	7.24786
M	hsc70	23.7256	-1.0224	-1.32238	-0.0343781	1.02412	1.18928	0.173937	12h	HSC70	22.6109	-3.38135	-3.47518	-2.39333	5.25369	5.27136	0.565317
M	hsc70	23.318	-1.50013		-0.455051	1.37083			12h	HSC70	22.5445	-3.59236		-2.54728	5.8453
M	hsc70	23.4835	-1.44462		-0.230085	1.1729			12h	HSC70	22.6093	-3.45182		-2.23728	4.71508
M 12h	actin	24.1923							24h	actin	25.5552
M	actin	24.1368							24h	actin	25.6554
M	actin	24.1611							24h	actin	25.5835
M	hsp90	27.9116	3.71932	3.90677	0.0167294	0.988471	0.916209	0.184775	24h	hsp90	26.3592	0.803939	0.949132	-2.89865	7.45728	7.0421	0.765395
M	hsp90	27.8993	3.76244		-0.0757828	1.05393			24h	hsp90	26.5848	0.929373		-2.90885	7.51019
M	hsp90	28.3997	4.23854		0.501803	0.706224			24h	hsp90	26.6976	1.11408		-2.62265	6.15882
M	hsp70	23.3989	-0.793347	-0.978726	0.188282	0.87765	1.04355	0.144098	24h	hsp70	22.6139	-2.94135	-2.97361	-1.95972	3.88986	4.14271	0.380947
M	hsp70	23.0222	-1.11464		-0.185984	1.13759			24h	hsp70	22.5311	-3.12428		-2.19562	4.58086
M	hsp70	23.133	-1.02819		-0.157555	1.11539			24h	hsp70	22.7283	-2.8552		-1.98456	3.95742
M	hsc70	23.4109	-0.781352	-0.588509	0.206668	0.866536	0.720487	0.148681	24h	hsc70	22.4746	-3.08069	-3.11984	-2.09267	4.26538	4.11611	0.368579
M	hsc70	23.9045	-0.232357		0.812722	0.569307			24h	hsc70	22.4772	-3.17819		-2.13312	4.38664
M	hsc70	23.4093	-0.751818		0.462717	0.725619			24h	hsc70	22.4829	-3.10062		-1.88608	3.69631
M 24h	actin	24.5552							48h	actin	24.2527
M	actin	24.6554							48h	actin	24.4332
M	actin	24.5835							48h	actin	24.3095
M	hsp90	27.7592	3.20394	3.14913	-0.498649	1.41289	1.53377	0.189206	48h	hsp90	27.659	3.40629	3.46285	-0.296301	1.22799	1.23278	0.132629
M	hsp90	27.6848	3.02937		-0.808849	1.75181			48h	hsp90	27.8196	3.38644		-0.451786	1.36773
M	hsp90	27.7976	3.21408		-0.522654	1.4366			48h	hsp90	27.9053	3.59583		-0.140913	1.1026
M	hsp70	23.3139	-1.24135	-0.873606	-0.259717	1.19724	0.975479	0.192082	48h	hsp70	23.7619	-0.490781	-0.634839	0.490848	0.711607	0.821943	0.113896
M	hsp70	23.9311	-0.724277		0.204382	0.86791			48h	hsp70	23.7994	-0.633764		0.294896	0.815131
M	hsp70	23.9283	-0.655195		0.215439	0.861284			48h	hsp70	23.5295	-0.779973		0.0906612	0.939092
M	hsc70	23.3746	-1.18069	-1.11984	-0.192673	1.14288	1.03391	0.150496	48h	hsc70	23.2657	-0.986993	-1.06006	0.00102654	0.999289	0.990292	0.129818
M	hsc70	23.4772	-1.17819		-0.133115	1.09666			48h	hsc70	23.2305	-1.20261		-0.157532	1.11538
M	hsc70	23.5829	-1.00062		0.213916	0.862194			48h	hsc70	23.3189	-0.990571		0.223963	0.85621
M 48h	actin	24.2527							72h	actin	24.9294
M	actin	24.4332							72h	actin	24.7742
M	actin	24.3095							72h	actin	24.7452
M	hsp90	27.959	3.70629	3.49618	0.00369949	0.997439	1.21058	0.191389	72h	hsp90	28.6411	3.71171	3.5867	0.0091198	0.993699	1.13959	0.213756
M	hsp90	27.8196	3.38644		-0.451786	1.36773			72h	hsp90	28.1426	3.36838		-0.469838	1.38495
M	hsp90	27.7053	3.39583		-0.340913	1.26656			72h	hsp90	28.4252	3.68		-0.0567417	1.04011
M	hsp70	23.5619	-0.690781	-0.768172	0.290848	0.817422	0.922058	0.279841	72h	hsp70	23.7961	-1.13326	-1.21557	-0.151627	1.11082	1.22786	0.156562
M	hsp70	23.9994	-0.433764		0.494896	0.709613			72h	hsp70	23.3542	-1.41995		-0.49129	1.4057
M	hsp70	23.1295	-1.17997		-0.309339	1.23914			72h	hsp70	23.6517	-1.0935		-0.222869	1.16705
M	hsc70	23.3657	-0.886993	-0.926725	0.101027	0.932369	0.906143	0.149392	72h	hsc70	24.2288	-0.70052	-0.682454	0.2875	0.81932	0.762585	0.101614
M	hsc70	23.3305	-1.10261		-0.0575321	1.04068			72h	hsc70	24.0098	-0.764328		0.280751	0.823163
M	hsc70	23.5189	-0.790571		0.423963	0.745374			72h	hsc70	24.1627	-0.582513		0.632022	0.645272
M 72h	actin	24.8294
M	actin	24.7742
M	actin	24.7452
M	hsp90	28.5411	3.71171	3.95336	0.0091198	0.993699	0.877994	0.103201
M	hsp90	28.9426	4.16838		0.330162	0.795447
M	hsp90	28.7252	3.98		0.243258	0.844835
M	hsp70	23.1961	-1.63326	-1.41557	-0.651627	1.57094	1.4077	0.142113
M	hsp70	23.4542	-1.31995		-0.39129	1.31157
M	hsp70	23.4517	-1.2935		-0.422869	1.34059
M	hsc70	23.2288	-1.60052	-1.54912	-0.6125	1.52891	1.38874	0.166896
M	hsc70	23.2098	-1.56433		-0.519249	1.43321
M	hsc70	23.2627	-1.48251		-0.267978	1.20412

## Sheet: intestine
Sample Name	Target Name	ct1/ct2/ct3	△ct	△△ct	2^-△△ct	mean	SD	Sample Name	Target Name	ct1/ct2/ct3	△ct	△△ct	2^-△△ct	mean	SD
I 0h	actin	22.5702						1h	actin	22.6248
I	actin	22.952						1h	actin	22.3683
I	actin	22.5021						1h	actin	22.4437
I	hsp90	26.6436	4.07335	0	1	1	0.128447	1h	HSP90	26.6059	3.98114	-0.0922035	1.066	1.19091	0.230479
I	hsp90	27.1999	4.24792	0	1			1h	HSP90	26.546	4.17774	-0.0701797	1.04985
I	hsp90	27.2111	4.70906	0	1			1h	HSP90	26.6099	4.16618	-0.542881	1.45688
I	hsp70	22.6185	0.0483093	0	1	1	0.190372	1h	HSP70	22.8396	0.214803	0.166494	0.891006	0.833586	0.0851289
I	hsp70	22.7996	-0.152405	0	1			1h	HSP70	22.6585	0.290248	0.442653	0.73578
I	hsp70	22.922	0.419899	0	1			1h	HSP70	23.058	0.614242	0.194343	0.873971
I	hsc70	22.3768	-0.193409	0	1	1	0.166792	1h	HSC70	21.9931	-0.631712	-0.438303	1.35501	1.145	0.200065
I	hsc70	22.2316	-0.720413	0	1			1h	HSC70	21.4801	-0.888212	-0.167799	1.12334
I	hsc70	21.9728	-0.529261	0	1			1h	HSC70	21.9784	-0.465311	0.0639496	0.956642
I 1h	actin	23.987						3h	actin	22.9648
I	actin	23.7401						3h	actin	23.2919
I	actin	23.561						3h	actin	23.2073
I	hsp90	27.8762	3.88916	-0.184185	1.13617			3h	HSP90	26.511	3.5462	-0.527148	1.44108	1.43824	0.0778157
I	hsp90	27.7503	4.01024	-0.23768	1.1791	1.22358	0.116221	3h	HSP90	26.9409	3.64898	-0.598938	1.5146
I	hsp90	27.8313	4.27027	-0.438797	1.35547			3h	HSP90	27.4738	4.26647	-0.442596	1.35905
I	hsp70	23.9581	-0.028933	-0.0772423	1.055	0.987419	0.108677	3h	HSP70	23.1297	0.164881	0.116572	0.922377	1.05131	0.115989
I	hsp70	23.5239	-0.216185	-0.0637798	1.0452			3h	HSP70	23.0226	-0.269289	-0.116884	1.08439
I	hsp70	24.195	0.634043	0.214144	0.862058			3h	HSP70	23.4292	0.221821	-0.198078	1.14717
I	hsc70	23.6669	-0.320141	-0.126732	1.09182	0.906957	0.161544	3h	HSC70	22.4724	-0.492476	-0.299067	1.23035	1.13027	0.104322
I	hsc70	23.2779	-0.462197	0.258216	0.836121			3h	HSC70	22.5398	-0.752047	-0.0316334	1.02217
I	hsc70	23.3665	-0.19453	0.334731	0.792932			3h	HSC70	22.4912	-0.716146	-0.186886	1.1383
I 3h	actin	23.8381						6h	actin	22.8702
I	actin	23.6408						6h	actin	22.9317
I	actin	23.3129						6h	actin	22.7148
I	hsp90	27.4966	3.6585	-0.414846	1.33316	1.32142	0.237059	6h	HSP90	25.3551	2.48492	-1.58843	3.00722	3.02226	0.102525
I	hsp90	27.2542	3.61342	-0.6345	1.5524			6h	HSP90	25.5328	2.60108	-1.64684	3.13148
I	hsp90	27.9127	4.59975	-0.109318	1.07872			6h	HSP90	25.8739	3.1591	-1.54996	2.92809
I	hsp70	23.9332	0.095108	0.0467987	0.968082	0.997549	0.0310657	6h	hsp70	20.3214	-2.54881	-2.59712	6.05078	6.36311	0.688936
I	hsp70	23.4458	-0.195047	-0.0426418	1.03			6h	hsp70	20.2221	-2.70961	-2.55721	5.88566
I	hsp70	23.7407	0.427761	0.00786209	0.994565			6h	hsp70	20.2961	-2.41863	-2.83853	7.1529
I	hsc70	22.8683	-0.969841	-0.776432	1.71289	1.47126	0.218719	6h	HSC70	21.8444	-1.02579	-0.832384	1.78063	1.42756	0.306534
I	hsc70	22.4205	-1.22026	-0.499851	1.41407			6h	HSC70	21.9135	-1.01823	-0.297821	1.22929
I	hsc70	22.4198	-0.893064	-0.363804	1.28681			6h	HSC70	21.8375	-0.877236	-0.347976	1.27277
I 6h	actin	24.576						12h	actin	24.1365
I	actin	24.4572						12h	actin	24.1535
I	actin	24.6368						12h	actin	23.7215
I	hsp90	28.3682	3.79219	-0.281161	1.21517	1.34728	0.147612	12h	HSP90	25.6707	1.53416	-2.53919	5.81263	6.21511	0.351467
I	hsp90	28.1138	3.65662	-0.591304	1.50661			12h	HSP90	25.7299	1.57635	-2.67157	6.37122
I	hsp90	28.9452	4.30845	-0.40061	1.32007			12h	HSP90	25.7387	2.0172	-2.69186	6.46148
I	hsp70	23.9709	-0.605081	-0.65339	1.57286	1.49913	0.23535	12h	HSP70	22.1037	-2.03282	-2.08113	4.23138	3.81934	0.36674
I	hsp70	23.9994	-0.457785	-0.30538	1.23574			12h	HSP70	22.182	-1.97153	-1.81912	3.52867
I	hsp70	24.3007	-0.33609	-0.755989	1.68879			12h	HSP70	22.2546	-1.46683	-1.88673	3.69797
I	hsc70	24.271	-0.304954	-0.111545	1.08038	0.933799	0.16099	12h	HSC70	21.7142	-2.4223	-2.22889	4.68772	4.63114	0.327372
I	hsc70	24.1299	-0.327328	0.393085	0.7615			12h	HSC70	21.1325	-3.02099	-2.30057	4.92654
I	hsc70	24.1672	-0.469635	0.0596256	0.959513			12h	HSC70	21.0949	-2.62659	-2.09733	4.27917
I 12h	actin	24.5282						24h	actin	22.929
I	actin	24.5433						24h	actin	23.0346
I	actin	24.5005						24h	actin	22.9951
I	hsp90	28.6657	4.13748	0.06413	0.956522	1.04889	0.240859	24h	hsp90	25.4092	2.48016	-1.59318	3.01715	3.41447	0.365395
I	hsp90	28.9956	4.45235	0.20443	0.867882			24h	hsp90	25.4792	2.44462	-1.8033	3.49018
I	hsp90	28.8065	4.30606	-0.403004	1.32226			24h	hsp90	25.8026	2.80754	-1.90152	3.73607
I	hsp70	23.9164	-0.611781	-0.660091	1.58018	1.56875	0.0720588	24h	hsp70	20.6885	-2.24056	-2.28887	4.88673	4.82293	0.490914
I	hsp70	23.814	-0.729327	-0.576922	1.49166			24h	hsp70	20.7768	-2.25782	-2.10542	4.30323
I	hsp70	24.2116	-0.288875	-0.708774	1.63441			24h	hsp70	21.0148	-1.98032	-2.40021	5.27882
I	hsc70	24.537	0.00881767	0.202227	0.869208	0.630568	0.211877	24h	hsc70	21.6609	-1.26816	-1.07475	2.10635	2.05843	0.131313
I	hsc70	24.9289	0.385657	1.10607	0.464558			24h	hsc70	21.3807	-1.6539	-0.933488	1.90989
I	hsc70	24.813	0.31256	0.84182	0.557939			24h	hsc70	21.3554	-1.63966	-1.1104	2.15905
I 24h	actin	23.9069						48h	actin	23.5038
I	actin	24.242						48h	actin	23.4769
I	actin	24.0449						48h	actin	23.7662
I	hsp90	27.651	3.74407	-0.32928	1.25639	1.36439	0.134885	48h	hsp90	26.9778	3.47401	-0.599338	1.51502	1.61323	0.190018
I	hsp90	28.0881	3.84608	-0.401846	1.3212			48h	hsp90	27.1472	3.67028	-0.577638	1.4924
I	hsp90	28.1541	4.1092	-0.599867	1.51558			48h	hsp90	27.6017	3.83545	-0.873616	1.83225
I	hsp70	23.9619	0.0550102	0.0067009	0.995366	1.16283	0.181699	48h	hsp70	21.7942	-1.70963	-1.75794	3.38215	3.69433	0.319724
I	hsp70	23.9042	-0.337783	-0.185378	1.13711			48h	hsp70	21.317	-2.15999	-2.00759	4.0211
I	hsp70	24.0254	-0.0194828	-0.439382	1.35602			48h	hsp70	22.3065	-1.4597	-1.8796	3.67973
I	hsc70	23.4743	-0.432586	-0.239177	1.18032	1.16605	0.0181128	48h	hsc70	22.5251	-0.978759	-0.78535	1.72351	1.54797	0.152327
I	hsc70	23.2924	-0.949574	-0.22916	1.17215			48h	hsc70	22.2009	-1.27608	-0.555665	1.46985
I	hsc70	23.3195	-0.725454	-0.196193	1.14567			48h	hsc70	22.7003	-1.06587	-0.536608	1.45056
I 48h	actin	24.3702						72h	actin	23.3912
I	actin	24.4703						72h	actin	23.3064
I	actin	24.502						72h	actin	23.4511
I	hsp90	28.5436	4.17334	0.0999936	0.933037	1.10252	0.223737	72h	hsp90	27.3875	3.99634	-0.0770092	1.05483	1.25048	0.200343
I	hsp90	28.6919	4.22161	-0.026311	1.0184			72h	hsp90	27.2423	3.93596	-0.311966	1.2414
I	hsp90	28.7716	4.26957	-0.439492	1.35613			72h	hsp90	27.619	4.16784	-0.541224	1.45521
I	hsp70	23.8532	-0.517005	-0.565314	1.47971	1.3864	0.127657	72h	hsp70	21.6369	-1.75428	-1.80259	3.48847	3.30478	0.21369
I	hsp70	24.0064	-0.463818	-0.311413	1.24092			72h	hsp70	21.5356	-1.77076	-1.61836	3.07026
I	hsp70	24.3973	-0.104742	-0.524641	1.43858			72h	hsp70	22.1245	-1.32668	-1.74658	3.35562
I	hsc70	23.8138	-0.556385	-0.362976	1.28608	1.0781	0.181949	72h	hsc70	23.4	0.00884857	0.202258	0.869189	0.813903	0.0984623
I	hsc70	23.8264	-0.643847	0.0765664	0.948312			72h	hsc70	23.1001	-0.2063	0.514114	0.700223
I	hsc70	23.9729	-0.529146	0.000114161	0.999921			72h	hsc70	23.119	-0.332153	0.197108	0.872298
I 72h	actin	23.3915
I	actin	23.4836
I	actin	23.6427
I	hsp90	27.8517	4.4602	0.386856	0.764794	0.995837	0.261631
I	hsp90	27.8165	4.33291	0.0849918	0.94279
I	hsp90	27.9957	4.353	-0.356061	1.27993
I	hsp70	23.677	0.285549	0.23724	0.848367	0.956438	0.126888
I	hsp70	23.444	-0.0396099	0.112795	0.924795
I	hsp70	23.9302	0.28745	-0.132449	1.09615
I	hsc70	22.5635	-0.827948	-0.634539	1.55244	1.35536	0.170787
I	hsc70	22.4404	-1.04322	-0.322807	1.25076
I	hsc70	22.7768	-0.865966	-0.336705	1.26287

## Sheet: heart
Sample Name	Target Name	ct1/ct2/ct3	△ct	MEAN△ct	△△ct	2^-△△ct	mean	SD	Sample Name	Target Name	ct1/ct2/ct3	△ct	MEAN△ct	△△ct	2^-△△ct	mean	SD
H 0h	actin	24.2029							1h	actin	23.5432
H	actin	24.2453							1h	actin	23.4414
H	actin	24.3382							1h	actin	23.3843
H	hsp90	27.4373	3.23441	3.2487	0	1	1	0.151293	1h	HSP90	25.5063	1.96308	2.0143	-1.27132	2.41383	2.36556	0.296704
H	hsp90	27.6519	3.40663		0	1			1h	HSP90	25.4501	2.00874		-1.3979	2.63518
H	hsp90	27.4432	3.10506		0	1			1h	HSP90	25.4554	2.07107		-1.03399	2.04769
H	hsp70	22.5249	-1.67802	-1.68544	0	1	1	0.0796893	1h	HSP70	22.1864	-1.35679	-1.20736	0.321228	0.800388	0.724316	0.113986
H	hsp70	22.4767	-1.76858		0	1			1h	HSP70	22.0326	-1.40883		0.359751	0.779299
H	hsp70	22.7284	-1.60972		0	1			1h	HSP70	22.5279	-0.856455		0.753261	0.593261
H	hsc70	23.427	-0.77591	-0.871836	0	1	1	0.0831255	1h	HSC70	21.9938	-1.54935	-1.49094	-0.773441	1.70934	1.54044	0.146943
H	hsc70	23.3225	-0.922717		0	1			1h	HSC70	21.9907	-1.45074		-0.528028	1.44196
H	hsc70	23.4213	-0.916881		0	1			1h	HSC70	21.9116	-1.47273		-0.555845	1.47003
H 1h	actin	22.835							3h	actin	24.2551
H	actin	22.7417							3h	actin	24.2899
H	actin	23.0034							3h	actin	24.158
H	hsp90	25.6542	2.81918	2.87368	-0.415228	1.33351	1.30042	0.116265	3h	HSP90	24.9801	0.725006	0.728192	-2.5094	5.69383	5.75842	0.598401
H	hsp90	25.9204	3.17865		-0.227981	1.17119			3h	HSP90	25.0215	0.731611		-2.67502	6.38649
H	hsp90	25.6266	2.6232		-0.481869	1.39655			3h	HSP90	24.886	0.72796		-2.3771	5.19493
H	hsp70	21.3629	-1.4721	-1.37124	0.205919	0.866986	0.813823	0.147473	3h	HSP70	22.4672	-1.78796	-1.28803	-0.109941	1.07918	0.785341	0.258496
H	hsp70	21.601	-1.14072		0.627852	0.647139			3h	HSP70	23.0696	-1.22029		0.548286	0.683832
H	hsp70	21.5025	-1.50089		0.108826	0.927342			3h	HSP70	23.3022	-0.85584		0.753877	0.593008
H	hsc70	22.1336	-0.701466	-0.518819	0.0744438	0.949708	0.790733	0.139505	3h	HSC70	22.3843	-1.87086	-2.05412	-1.09495	2.13605	2.28698	0.356173
H	hsc70	22.357	-0.38473		0.537987	0.688731			3h	HSC70	21.9375	-2.35234		-1.42962	2.69377
H	hsc70	22.5331	-0.470261		0.446619	0.73376			3h	HSC70	22.2188	-1.93915		-1.02227	2.03112
H 3h	actin	23.599							6h	actin	23.5268
H	actin	23.6348							6h	actin	23.469
H	actin	23.4129							6h	actin	23.3156
H	hsp90	26.7819	3.18299	3.13214	-0.051416	1.03628	1.10996	0.299225	6h	HSP90	23.8609	0.334003	0.347893	-2.9004	7.46635	7.49194	0.726772
H	hsp90	26.5163	2.88143		-0.525203	1.43914			6h	HSP90	23.8345	0.365536		-3.0411	8.23118
H	hsp90	26.7449	3.332		0.226934	0.854449			6h	HSP90	23.6597	0.344139		-2.76093	6.77831
H	hsp70	21.5757	-2.02328	-1.86249	-0.345267	1.27039	1.13456	0.118479	6h	hsp70	19.3153	-4.21158	-4.10713	-2.53356	5.78998	5.36621	0.367987
H	hsp70	21.7924	-1.84241		-0.0738304	1.05251			6h	hsp70	19.3271	-4.14189		-2.37331	5.18129
H	hsp70	21.6911	-1.72178		-0.112062	1.08077			6h	hsp70	19.3477	-3.96793		-2.35821	5.12736
H	hsc70	23.289	-0.309924	-0.506371	0.465986	0.723976	0.788902	0.17835	6h	HSC70	20.4034	-3.12347	-3.12409	-2.34756	5.08962	4.77116	0.314065
H	hsc70	23.3289	-0.305905		0.616811	0.652111			6h	HSC70	20.3887	-3.0803		-2.15759	4.46168
H	hsc70	22.5096	-0.903284		0.0135963	0.99062			6h	HSC70	20.1471	-3.1685		-2.25162	4.76218
H 6h	actin	24.2251							12h	actin	24.4504
H	actin	24.3373							12h	actin	24.4587
H	actin	24.2711							12h	actin	24.5146
H	hsp90	27.8552	3.6301	3.48748	0.395695	0.760123	0.859124	0.179548	12h	HSP90	25.2211	0.770699	0.835941	-2.46371	5.51632	5.34913	0.613128
H	hsp90	27.6512	3.31391		-0.0927212	1.06638			12h	HSP90	25.3141	0.855407		-2.55123	5.86133
H	hsp90	27.7895	3.51843		0.413366	0.750869			12h	HSP90	25.3963	0.881718		-2.22335	4.66975
H	hsp70	21.972	-2.25314	-2.20086	-0.575126	1.48981	1.4435	0.24205	12h	HSP70	19.8478	-4.60255	-4.65368	-2.92453	7.59227	7.83924	0.567883
H	hsp70	22.3279	-2.00936		-0.240787	1.18164			12h	HSP70	19.7955	-4.66323		-2.89465	7.43665
H	hsp70	21.931	-2.34007		-0.730353	1.65905			12h	HSP70	19.8193	-4.69527		-3.08556	8.48879
H	hsc70	22.947	-1.27808	-1.53304	-0.50217	1.41634	1.59237	0.233781	12h	HSC70	20.3774	-4.07295	-4.01805	-3.29704	9.82895	8.88117	0.868953
H	hsc70	22.5211	-1.81618		-0.89346	1.85763			12h	HSC70	20.5142	-3.94456		-3.02184	8.12204
H	hsc70	22.7662	-1.50487		-0.587986	1.50315			12h	HSC70	20.478	-4.03665		-3.11977	8.69251
H 12h	actin	24.7865							24h	actin	23.8879
H	actin	24.9394							24h	actin	23.9232
H	actin	24.7509							24h	actin	23.9738
H	hsp90	27.299	2.51248	2.6033	-0.721925	1.64938	1.58998	0.341897	24h	hsp90	24.8902	1.00229	1.08983	-2.23212	4.69822	4.49147	0.576639
H	hsp90	27.4213	2.48194		-0.924699	1.89829			24h	hsp90	25.0264	1.10322		-2.30341	4.93624
H	hsp90	27.5664	2.81549		-0.289574	1.22228			24h	hsp90	25.1378	1.16397		-1.94109	3.83996
H	hsp70	23.1658	-1.62067	-1.36603	0.0573448	0.961031	0.821375	0.209491	24h	hsp70	19.11	-4.77799	-4.80779	-3.09997	8.57401	8.7569	1.14126
H	hsp70	23.287	-1.65235		0.116227	0.922598			24h	hsp70	19.2063	-4.71683		-2.94825	7.71814
H	hsp70	23.9258	-0.825073		0.784643	0.580496			24h	hsp70	19.0452	-4.92855		-3.31883	9.97856
H	hsc70	23.3924	-1.39405	-1.43574	-0.618136	1.53489	1.48647	0.187842	24h	hsc70	20.6224	-3.2655	-3.50683	-2.48959	5.6162	6.22774	0.538889
H	hsc70	23.6615	-1.2779		-0.355187	1.27915			24h	hsc70	20.3147	-3.60841		-2.68569	6.4339
H	hsc70	23.1156	-1.63528		-0.718397	1.64535			24h	hsc70	20.3272	-3.64656		-2.72968	6.6331
H 24h	actin	24.2089							48h	actin	23.3003
H	actin	24.2615							48h	actin	23.2677
H	actin	24.0493							48h	actin	23.5285
H	hsp90	27.2629	3.05398	2.96488	-0.180421	1.13321	1.22094	0.115226	48h	hsp90	26.3987	3.09842	2.88208	-0.135981	1.09884	1.29751	0.173864
H	hsp90	27.2336	2.97214		-0.434492	1.35143			48h	hsp90	26.2182	2.95053		-0.456103	1.37183
H	hsp90	26.9178	2.86852		-0.236544	1.17817			48h	hsp90	26.1258	2.59728		-0.507784	1.42186
H	hsp70	23.5446	-0.664334	-0.920696	1.01368	0.49528	0.594242	0.100408	48h	hsp70	21.7984	-1.50189	-1.61361	0.176125	0.885077	0.965522	0.20807
H	hsp70	23.0157	-1.24581		0.522767	0.696035			48h	hsp70	21.8037	-1.46401		0.304567	0.809685
H	hsp70	23.1973	-0.851945		0.757771	0.591409			48h	hsp70	21.6536	-1.87492		-0.265202	1.2018
H	hsc70	23.2774	-0.931515	-0.789373	-0.155605	1.11389	0.952823	0.155112	48h	hsc70	22.4186	-0.88169	-0.724522	-0.10578	1.07608	0.914495	0.174773
H	hsc70	23.4278	-0.833659		0.0890573	0.940137			48h	hsc70	22.801	-0.466696		0.456021	0.728994
H	hsc70	23.4463	-0.602943		0.313937	0.804443			48h	hsc70	22.7034	-0.82518		0.0917011	0.938416
H 48h	actin	24.7319							72h	actin	23.9287
H	actin	24.7882							72h	actin	23.9361
H	actin	24.6319							72h	actin	24.0044
H	hsp90	27.4379	2.70592	2.89874	-0.528485	1.44241	1.31933	0.397532	72h	hsp90	27.742	3.81327	3.76309	0.578869	0.669488	0.70287	0.0779462
H	hsp90	27.4804	2.69227		-0.714367	1.64076			72h	hsp90	27.6792	3.74316		0.336523	0.791947
H	hsp90	27.9299	3.29802		0.192953	0.874813			72h	hsp90	27.7373	3.73284		0.627775	0.647174
H	hsp70	22.4135	-2.31847	-2.1893	-0.640448	1.55881	1.43251	0.240811	72h	hsp70	22.6958	-1.23288	-1.38156	0.445133	0.734517	0.824944	0.19895
H	hsp70	22.8119	-1.97624		-0.207668	1.15482			72h	hsp70	22.7086	-1.22752		0.541055	0.687268
H	hsp70	22.3587	-2.27319		-0.663471	1.58389			72h	hsp70	22.3201	-1.68429		-0.0745693	1.05305
H	hsc70	23.848	-0.883973	-1.03513	-0.108063	1.07778	1.1268	0.155921	72h	hsc70	23.076	-0.852757	-0.677641	-0.0768475	1.05471	0.882389	0.152065
H	hsc70	23.4854	-1.30271		-0.379995	1.30134			72h	hsc70	23.2901	-0.645936		0.276781	0.825431
H	hsc70	23.7131	-0.91872		-0.00183907	1.00128			72h	hsc70	23.4702	-0.534229		0.382652	0.767027
H 72h	actin	25.3855
H	actin	25.3548
H	actin	25.3528
H	hsp90	27.9963	2.61087	2.59122	-0.623539	1.54065	1.58271	0.161631
H	hsp90	27.9449	2.59007		-0.816565	1.76121
H	hsp90	27.9256	2.57274		-0.532326	1.44626
H	hsp70	23.3295	-2.05591	-1.82103	-0.377896	1.29945	1.10728	0.173179
H	hsp70	23.5034	-1.85141		-0.0828339	1.0591
H	hsp70	23.7971	-1.55576		0.0539574	0.96329
H	hsc70	23.9123	-1.47318	-1.46871	-0.697272	1.62144	1.51495	0.106723
H	hsc70	23.8324	-1.52244		-0.599725	1.51543
H	hsc70	23.9423	-1.41052		-0.493638	1.40799
